# Supplementary material for: Tuning oxidative modification by a strong electric field using nanoESI of highly conductive solutions near the minimum flow rate
Source: Royal Society of Chemistry journal article supplement (doi:10.1039/d2sc07113d), 2023-01-01
Supplement: d2sc07113d4.pdf [file d2sc07113d4.pdf]

Supporting information

# Tuning oxidative modification by strong electric field using nanoESI of highly conductive solutions near minimum flow rate

Zhongbao Han, Nozomu Omata, Takeshi Matsuda, Shoki Hishida, Shuuhei Takiguchi, Ryoki Komori, Riku Suzuki, Lee Chuin Chen\*

*Faculty of Engineering, University of Yamanashi, 4-3-11, Takeda, Kofu, Yamanashi, 400-8511 Japan*

**\*To whom correspondence should be addressed:**

L. C. Chen, E-mail: [leechuin@yamanashi.ac.jp](mailto:leechuin@yamanashi.ac.jp), Phone: +81-55-220-8072

## Screenshots and captions for movies

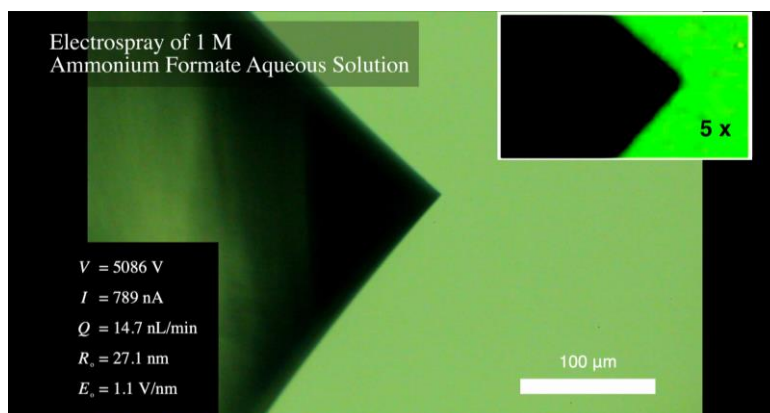

**Movie 1.** Electro spray of 1 M ammonium formate aqueous solution using micropipette tip (i.d. 0.4mm) under high-pressure (0.5 MPa gauge pressure) condition. The upper right inset shows the magnified (5 $\times$ ) image of the apex of the Taylor cone. The contrast and brightness are adjusted to increase the sharpness.

$V$ : emitter voltage,  $I$ : measured spray current,  $Q$ : solution flow rate,  $R_o$ : droplet radius,  $E_o$ : electric field.  $Q$ ,  $R_o$ , &  $E_o$  are calculated using Equations 1-3. Electric conductivity of the solution  $K = 8.67 \text{ S/m}$ .

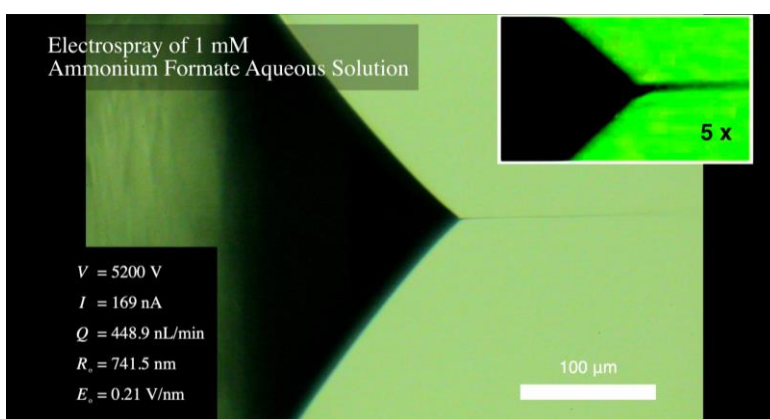

**Movie 2.** Electro spray of 1 mM ammonium formate aqueous solution. Electric conductivity of the solution  $K = 0.013 \text{ S/m}$ .

**Figure S1: Typical high-pressure nanoESI MS**

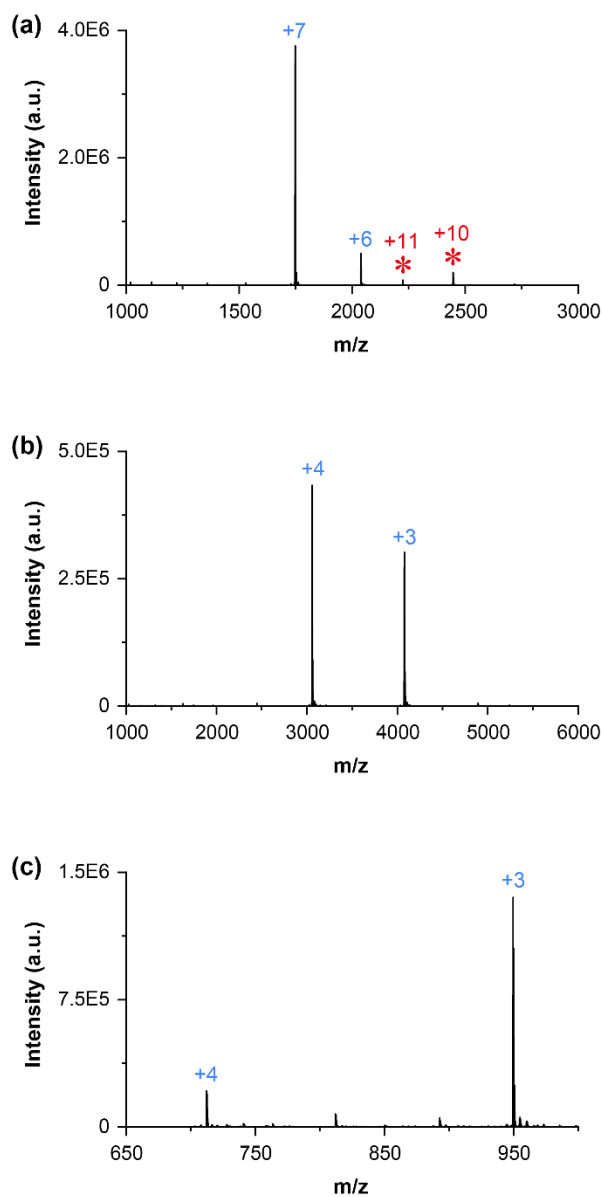

**Figure S1.** Typical high-pressure nanoESI mass spectra of protein and peptide acquired under nonoxidizing conditions. **a)** Cytochrome *c* (10  $\mu$ M) in 100 mM ammonium formate. Asterisk \* denotes the dimer. **b)** Cytochrome *c* in 100 mM tetraethylammonium bicarbonate. **c)** 10  $\mu$ M melittin in 100 mM ammonium formate.

**Figure S2: Cytochrome c in 1 M ammonium formate**

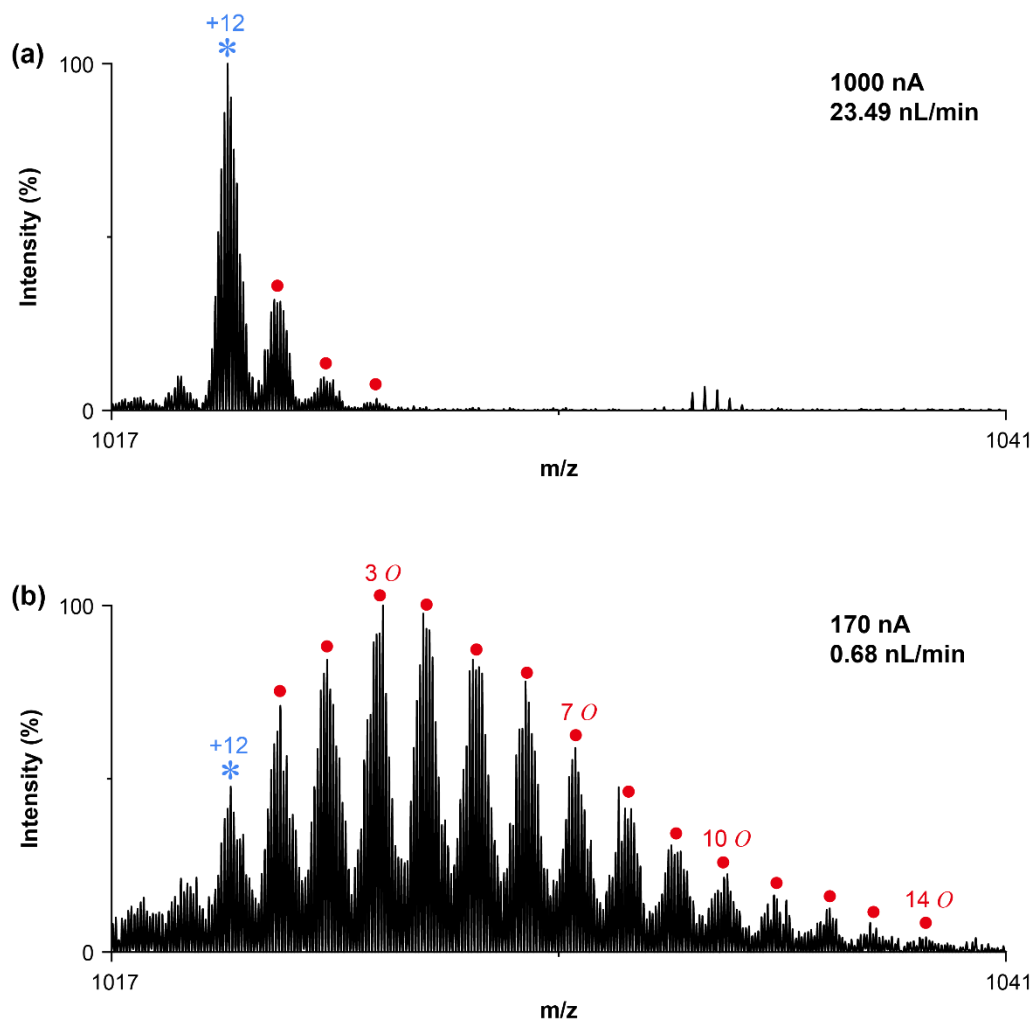

**Figure S2.** Mass spectra of cytochrome *c* in 1 M ammonium formate acquired at different spray currents and flow rates. **a)** Spray current: 1000 nA, flow rate: 23.5 nL/min. **b)** Spray current: 200 nA, flow rate: 0.9 nL/min. Red solid circle denotes the oxidized peak ( $M + nO$ ). Asterisk denotes the unoxidized peak.

**Figure S3: Ubiquitin in 1 M ammonium formate**

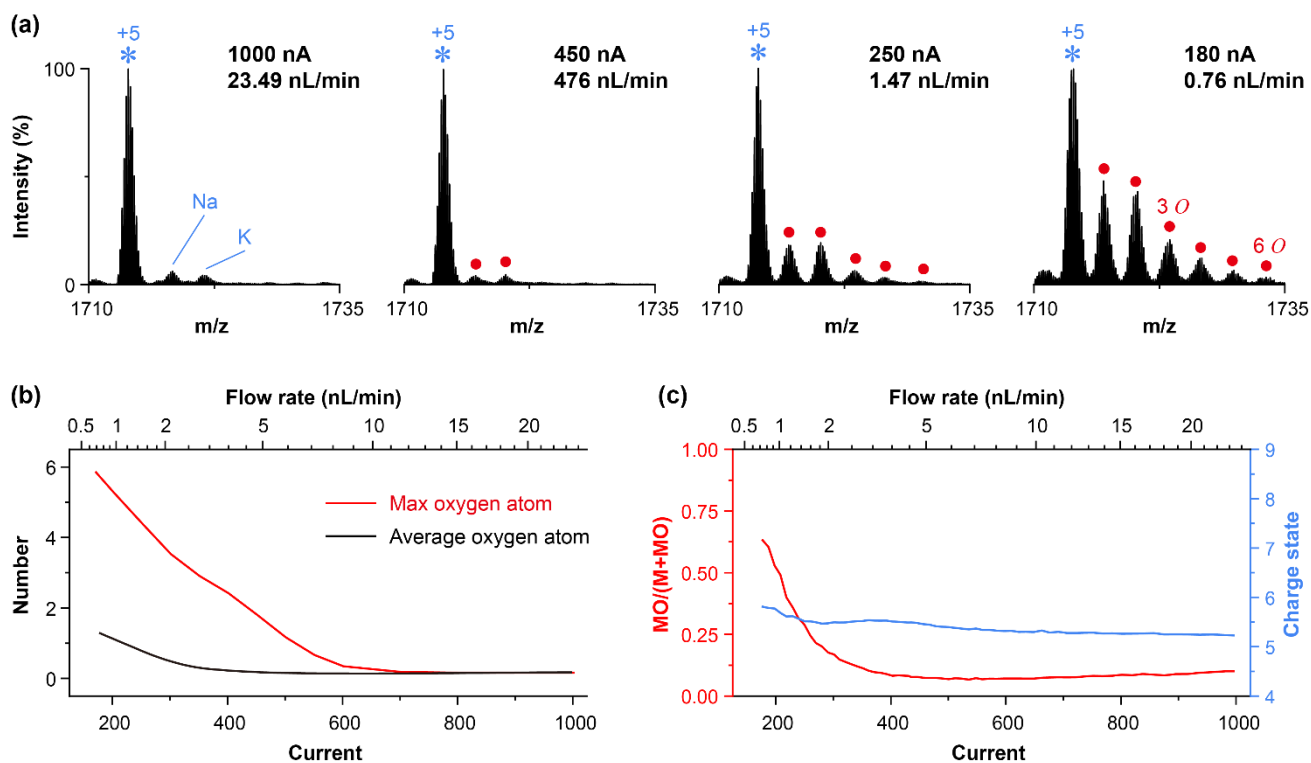

**Figure S3. a)** Mass spectra of ubiquitin (25  $\mu$ M) in 1 M ammonium formate aqueous solution acquired at different spray currents. Red solid circle denotes the oxidized peak. Asterisk denotes the unoxidized peak. **b)** Maximum (red) and the calculated average (black) number of oxygen atoms versus spray current. **c)** Ratio of total oxidized ion species to the total ion signal (red) and the average charge state (blue) versus spray current.

**Figure S4: Heatmaps of cytochrome c and ubiquitin**

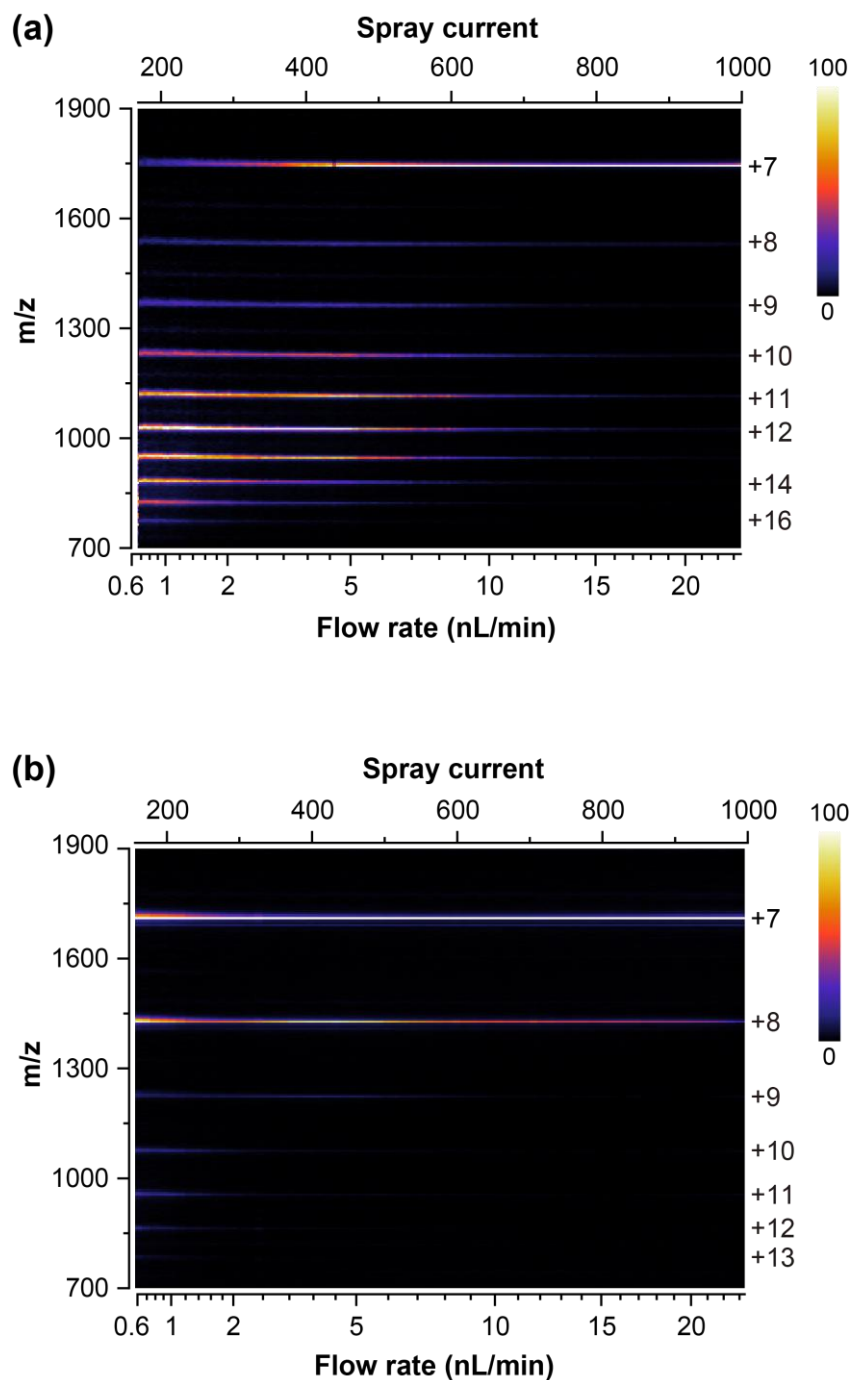

**Figure S4.** Heatmaps showing the effect of flow rate on the charged state of a) cytochrome *c* (25  $\mu\text{M}$ ) and b) ubiquitin (25  $\mu\text{M}$ ) in 1 M ammonium formate aqueous solution.

## Table S1: Amino acid sequence

### Apo-cytochrome *c* (CC) 11572.35

GDVEKGGKKIFVQKCAQCHTVEKGGKHKGTGPNLHGLFGRKTGQAPGFSYTDANKNKGITW  
GEETLMEYLENPKKYIPGTKMIFAGIKKKGEREDLIAYLKKATNE

### Ubiquitin (UB) 8564.84

MQIFVKTLTGKTITLEVEPSDTIENVKAKIQDKEGIPPDQQLIFAGKQLEDGRTLSDYNIQKE  
STLHLVLRRLRGG

### Melittin (MLT) 2847.5

GIGAVLKVLTTGLPALISWIKRKRQQ

### Angiotensin (AG) 1296.49

DRVYIHPFHL

|     | Cys (C) | Met (M) | Trp (W) | Tyr (Y) | His (H) | Phe (F) | Total |
|-----|---------|---------|---------|---------|---------|---------|-------|
| CC  | 2       | 2       | 1       | 4       | 3       | 4       | 16    |
| UB  | 0       | 1       | 0       | 1       | 1       | 2       | 5     |
| MLT | 0       | 0       | 1       | 0       | 0       | 0       | 1     |
| AG  | 0       | 0       | 0       | 1       | 2       | 1       | 4     |

**Table S1.** Amino acid sequences of apo-cytochrome *c*, ubiquitin, melittin, and angiotensin. The amino acids whose R group is easily oxidized are marked in red.

**Figure S5: Oxidation using ESI plus corona discharge under atmospheric pressure**

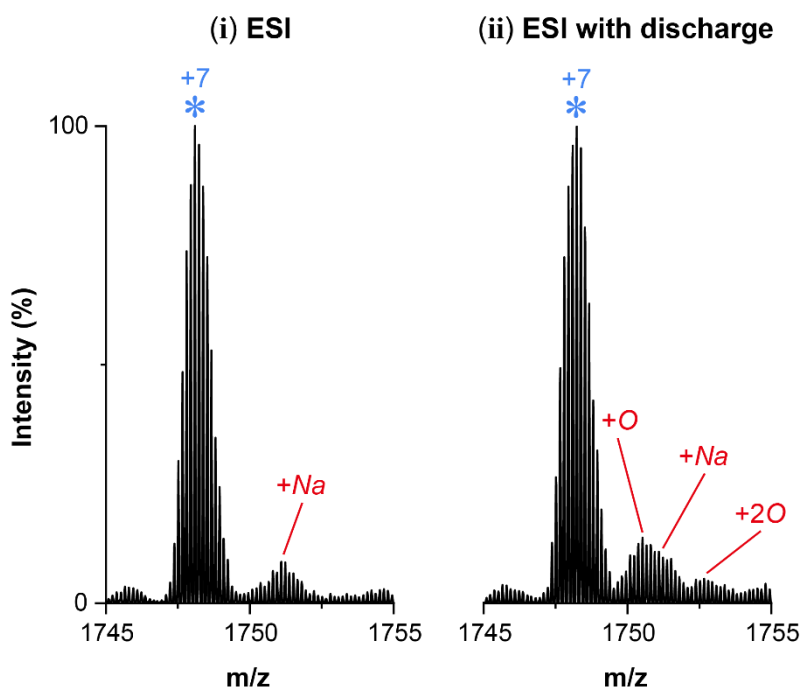

**Figure S5.** Mass spectra of cytochrome *c* (10  $\mu$ M) in 100 mM ammonium formate in 50% ethanol. **(i)** Standard atmospheric pressure ESI. **(ii)** Atmospheric pressure ESI with a higher voltage to induce an electric discharge with a current of 8  $\mu$ A. The solution flow rate is 0.5  $\mu$ L/min.



**Figure S6: Measurement using in-emitter electrochemical reactor**

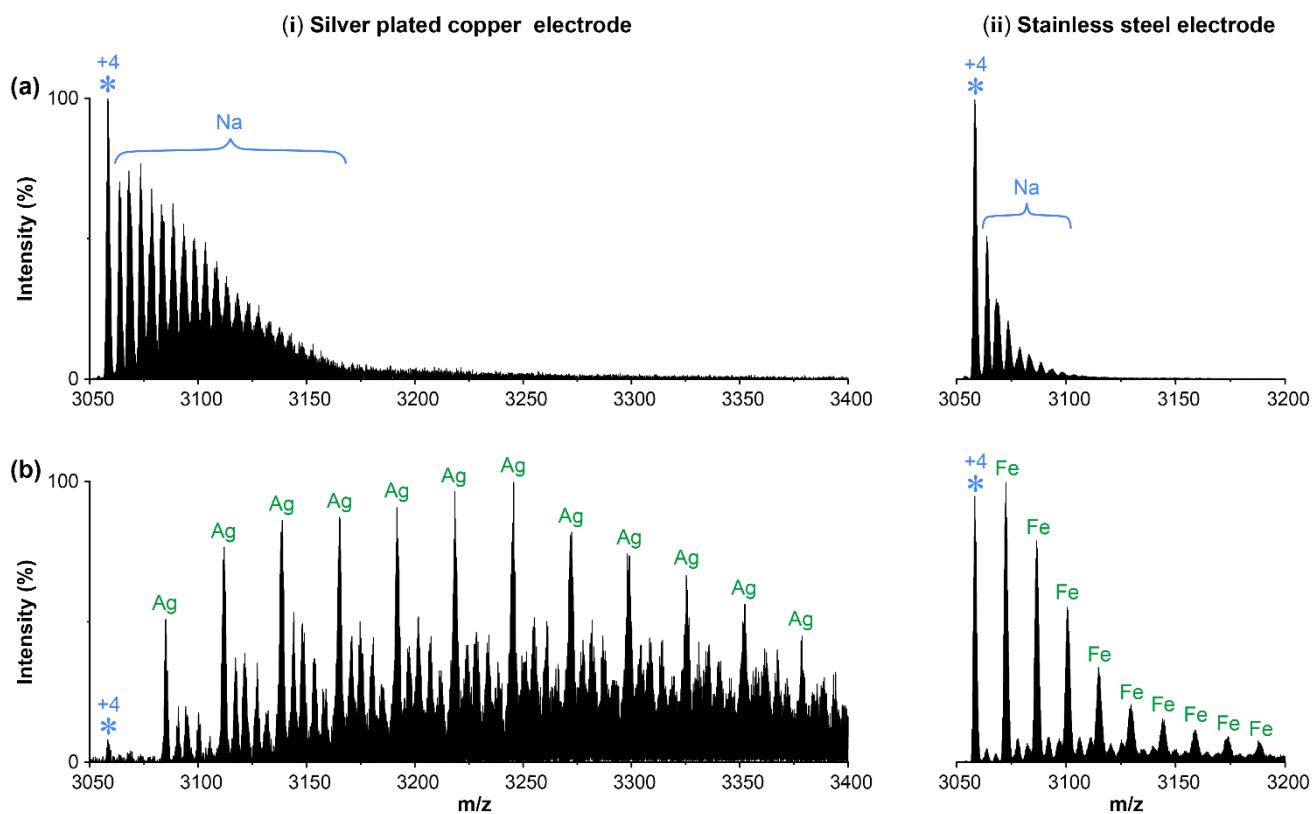

**Figure S6.** Mass spectra of cytochrome *c* in 100 mM tetraethylammonium bicarbonate acquired by nanoESI with an in-emitter electrochemical (EC) reactor. The oxidation electrodes are (i) Silver-plated copper and (ii) stainless steel. (a) and (b) are the mass spectra acquired at 0 min and 20 min after the turn ON of the EC reactor.

**Figure S7: Oxidation of melittin in H<sub>2</sub><sup>18</sup>O**

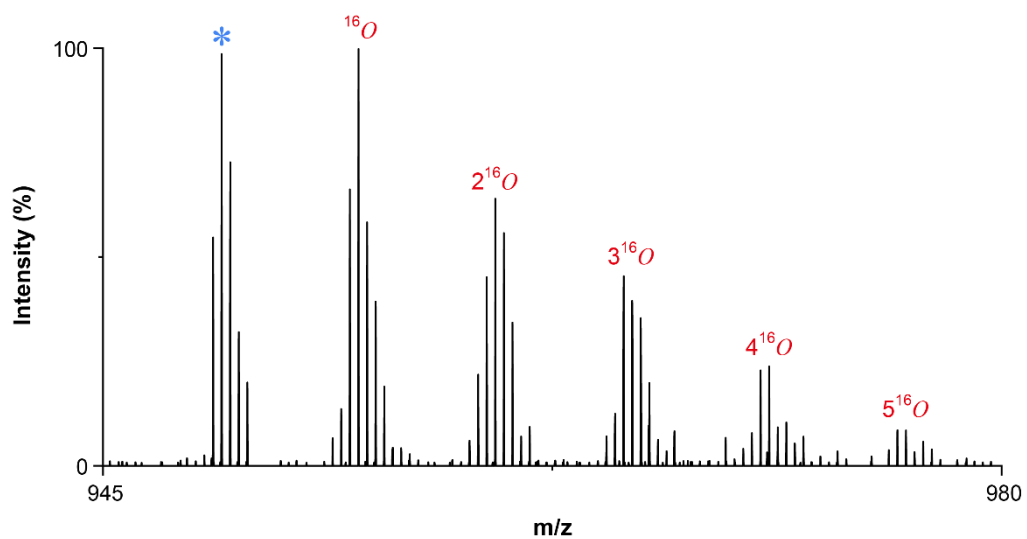

**Figure S7.** Mass spectrum of melittin oxidized by strong electric field-induced oxidation. The sample solution is prepared using ammonium acetate (~1.5 M) in water-<sup>18</sup>O. Asterisk denotes the unoxidized peak.

**Figure S8: Detection of H<sub>2</sub>O<sub>2</sub> using ADHP**

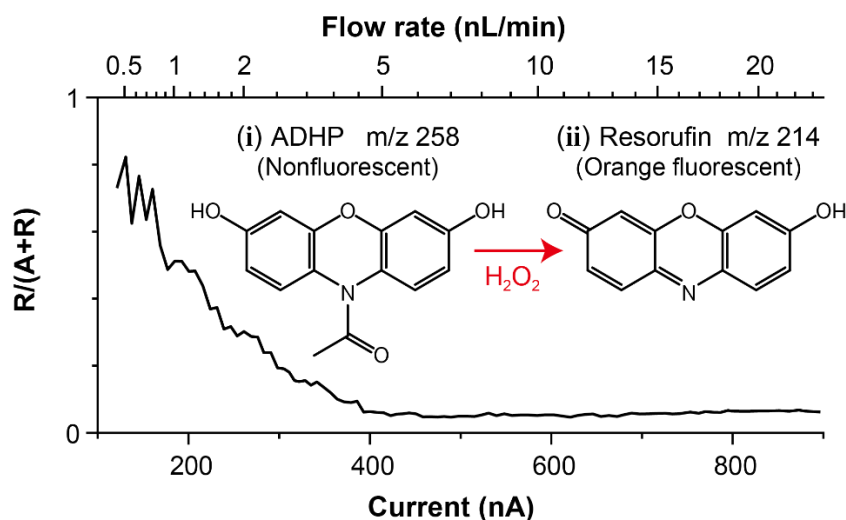

**Figure S8.** Detection of hydrogen peroxide H<sub>2</sub>O<sub>2</sub> using ADHP.

The hydroxyl radical can form hydrogen peroxide H<sub>2</sub>O<sub>2</sub> in solution. The detection of H<sub>2</sub>O<sub>2</sub> in the solution is performed using 10-Acetyl-3,7-dihydroxyphenoxazine (ADHP, Amplex Red) which is a widely used fluorescent probe molecule for H<sub>2</sub>O<sub>2</sub>. ADHP converts to resorufin by H<sub>2</sub>O<sub>2</sub>. Because the electric field-induced oxidation takes place only within a small volume of the order of (10 nm)<sup>3</sup>, the direct fluorescent measurement at the Taylor cone tip is difficult. Nevertheless, resorufin and the ADHP are readily detected as protonated species by the present nanoESI-MS. Figure S8 shows the plot of the ratio of resorufin intensity to the intensity of (ADHP + resorufin) versus the spray current. The abundance of H<sub>2</sub>O<sub>2</sub> is the highest at the strongest electric field at the lowest spray current and flow rate.

**Figure S9: Oxidation of ubiquitin in oxygen**

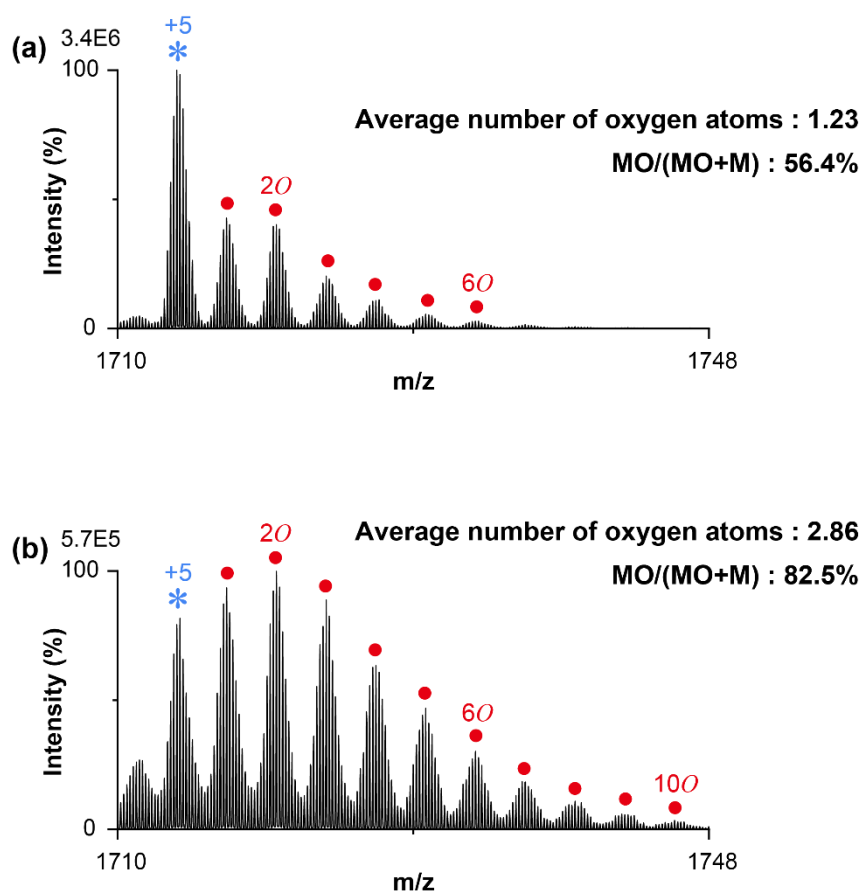

**Figure S9:** Oxidation of ubiquitin using air and oxygen as operating gases.

**a)** 0.5 MPa dry air (default in this study).

**b)** 99.5 % oxygen at 0.3 MPa.

The values show the average number of the incorporated oxygen atoms and the percentage of oxidation for charge state +5. The spray current is 200 nA. Ubiquitin concentration: 20  $\mu$ M. The solvent is 1 M ammonium acetate aqueous solution. Red solid circle denotes the oxidized peak. Asterisk denotes the unoxidized peak.

**Figure S10: Oxidation of PC in oxygen**

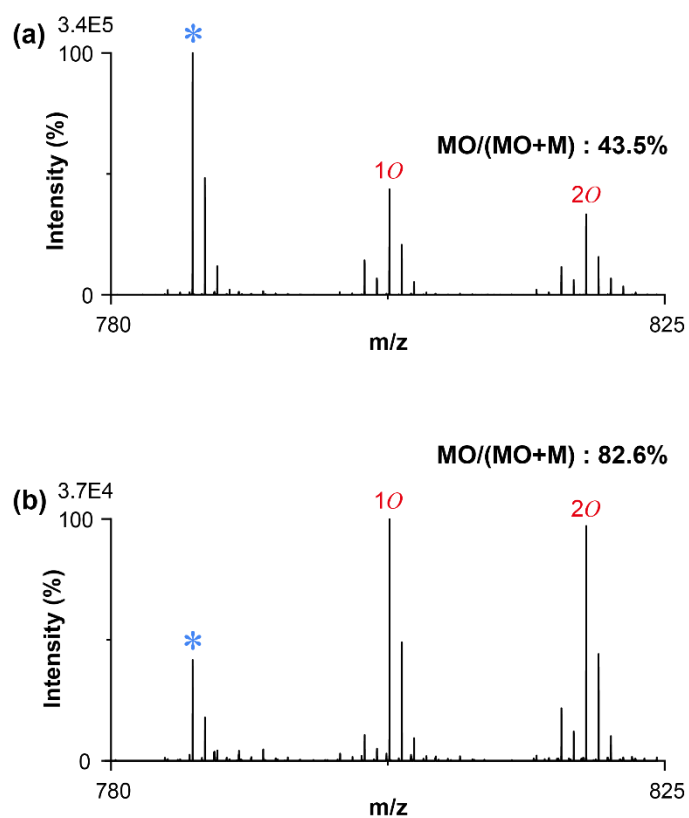

**Figure S10.** Oxidation of L-phosphatidylcholine (PC 18:1/18:1) using air and oxygen as operating gases.

**a)** 0.5 MPa dry air (default in this study). Percentage of oxidation = 43.5 %

**b)** 99.5 % oxygen at 0.3 MPa. Percentage of oxidation = 82.6 %

Asterisk denotes the unoxidized peak. MO is the total intensity of all oxidized species. M is the intensity of the unoxidized species. The spray current is  $\sim 250$  nA in both cases. PC concentration: 5  $\mu$ M. The solvent is 500 mM HCl in water:acetonitrile 9:1.  $K = 14.7$  S/m.

**Figure S11: Oxidation using glass capillary with 5  $\mu\text{m}$  i.d.**

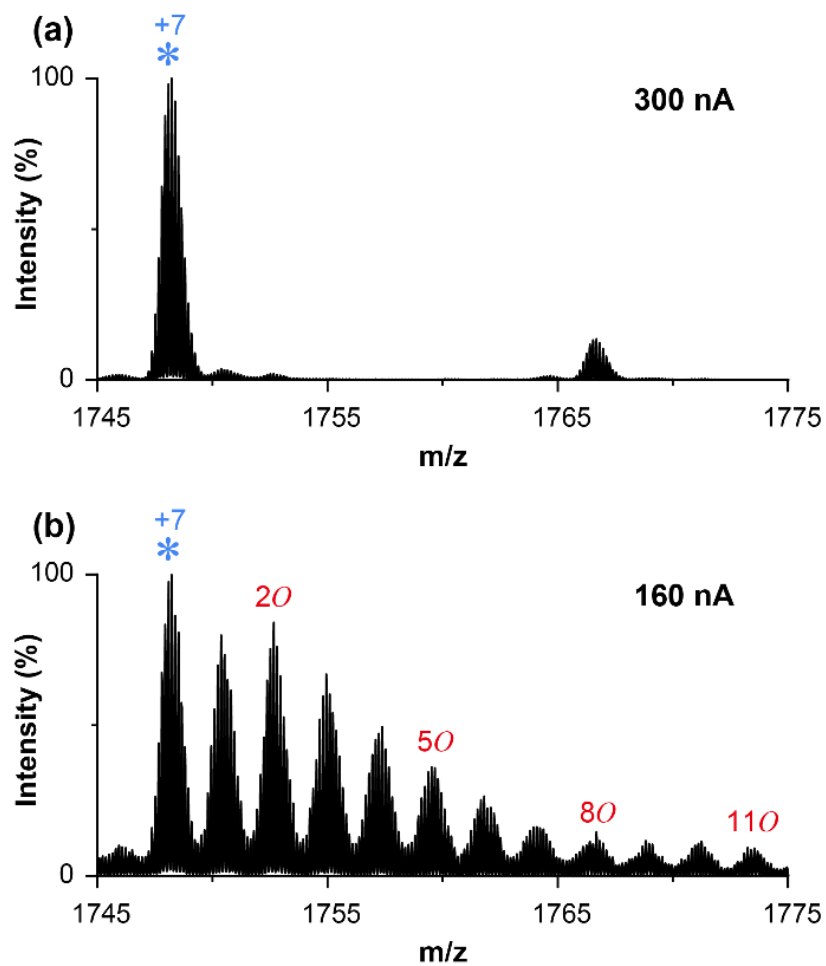

**Figure S11:** Oxidation of cytochrome *c* using pulled-glass capillary with i.d. of 5  $\mu\text{m}$ .

**a)** Mass spectrum acquired at 300 nA spray current. Non-oxidizing condition.

**b)** Mass spectrum acquired at 160 nA. Oxidizing condition.

Sample: 20  $\mu\text{M}$  cytochrome *c* in 1 M ammonium formate aqueous solution.

Operating gas: air at 0.5 MPa. Asterisk denotes the unoxidized peak.
